# Supplementary material
Source: HighWire-hosted journal article supplement (https://bmjopen.bmj.com/content/12/8/e064521)
Supplement: inline-supplementary-material-3 [file inline-supplementary-material-3.pdf]

**Supplementary File 3. Quality assessment using the Joanna Briggs Institute critical appraisal tools**

| Study                               | Q1 | Q2 | Q3 | Q4 | Q5 | Q6 | Q7 | Q8 | Q9 | Q10 | Q11 | Q12 | Q13 | Raw score |
|-------------------------------------|----|----|----|----|----|----|----|----|----|-----|-----|-----|-----|-----------|
| <b>Randomized controlled trials</b> |    |    |    |    |    |    |    |    |    |     |     |     |     |           |
| Bonovich 1990(1)                    | U  | U  | Y  | U  | N  | NA | Y  | NA | Y  | Y   | Y   | Y   | Y   | 64%       |
| Butz 2005(2)                        | Y  | Y  | Y  | U  | N  | U  | Y  | N  | Y  | Y   | Y   | Y   | Y   | 69%       |
| Craun 1987(3)                       | U  | U  | U  | U  | U  | NA | NA | NA | Y  | Y   | Y   | Y   | Y   | 50%       |
| Jurgens 2013(4)                     | Y  | Y  | Y  | U  | N  | NA | Y  | Y  | Y  | Y   | Y   | Y   | Y   | 83%       |
| Scott 2012(5)                       | Y  | Y  | Y  | N  | N  | NA | Y  | Y  | Y  | Y   | Y   | Y   | Y   | 83%       |
| Colland 2004(6)                     | Y  | Y  | Y  | U  | N  | U  | Y  | Y  | Y  | Y   | Y   | Y   | Y   | 77%       |
| Eriksen 2010(7)                     | Y  | NA | N  | U  | N  | NA | Y  | NA | Y  | Y   | Y   | Y   | Y   | 70%       |
| Hunt 2015(8)                        | U  | U  | N  | U  | N  | NA | NA | Y  | Y  | Y   | Y   | Y   | Y   | 55%       |
| McLendon 1982(9)                    | Y  | U  | N  | U  | N  | U  | Y  | N  | Y  | Y   | Y   | Y   | Y   | 54%       |
| <b>Quasi-experimental studies</b>   |    |    |    |    |    |    |    |    |    |     |     |     |     |           |
| Brailey 1986(10)                    | Y  | U  | NA | Y  | N  | Y  | Y  | Y  | Y  |     |     |     |     | 75%       |
| Hendricson 1996(11)                 | Y  | NA | NA | N  | NA | NA | NA | Y  | Y  |     |     |     |     | 75%       |
| Shepherd 2007(12)                   | Y  | NA | NA | N  | N  | NA | NA | Y  | Y  |     |     |     |     | 60%       |
| Brooks 2001(13)                     | Y  | U  | NA | Y  | N  | U  | Y  | Y  | Y  |     |     |     |     | 63%       |
| Cornell 2015(14)                    | Y  | Y  | NA | Y  | N  | NA | Y  | Y  | Y  |     |     |     |     | 86%       |
| Davis 2019(15)                      | Y  | NA | NA | N  | Y  | NA | NA | Y  | Y  |     |     |     |     | 80%       |
| Khokhar 2009(16)                    | Y  | NA | NA | N  | N  | NA | NA | Y  | Y  |     |     |     |     | 60%       |
| Luther 1985(17)                     | Y  | NA | NA | N  | Y  | NA | NA | Y  | Y  |     |     |     |     | 80%       |
| Matin 2020(18)                      | Y  | NA | NA | N  | Y  | NA | NA | Y  | Y  |     |     |     |     | 80%       |
| Robertson 2014(19)                  | Y  | N  | NA | Y  | N  | NA | Y  | Y  | Y  |     |     |     |     | 71%       |
| Sorensen 2005(20)                   | Y  | N  | NA | Y  | N  | NA | Y  | Y  | Y  |     |     |     |     | 71%       |
| Stratton 1994(21)                   | Y  | NA | NA | N  | N  | NA | NA | Y  | Y  |     |     |     |     | 60%       |
| Styrd 1982(22)                      | Y  | NA | NA | N  | Y  | NA | NA | Y  | Y  |     |     |     |     | 80%       |
| <b>Qualitative research</b>         |    |    |    |    |    |    |    |    |    |     |     |     |     |           |
| Ziadé 2021(23)                      | Y  | Y  | U  | U  | Y  | Y  | U  | N  | Y  | Y   |     |     |     | 60%       |

N: no, NA: not applicable, U: unclear, Y: yes.

**Checklist for randomized controlled trials:**

Q1. Was true randomization used for assignment of participants to treatment groups?

Q2. Was allocation to treatment groups concealed?

- Q3. Were treatment groups similar at the baseline?
- Q4. Were participants blind to treatment assignment?
- Q5. Were those delivering treatment blind to treatment assignment?
- Q6. Were outcomes assessors blind to treatment assignment?
- Q7. Were treatment groups treated identically other than the intervention of interest?
- Q8. Was follow up complete and if not, were differences between groups in terms of their follow up adequately described and analyzed?
- Q9. Were participants analyzed in the groups to which they were randomized?
- Q10. Were outcomes measured in the same way for treatment groups?
- Q11. Were outcomes measured in a reliable way?
- Q12. Was appropriate statistical analysis used?
- Q13. Was the trial design appropriate, and any deviations from the standard RCT design (individual randomization, parallel groups) accounted for in the conduct and analysis of the trial?

**Checklist for quasi-experimental studies:**

- Q1. Is it clear in the study what is the 'cause' and what is the 'effect' (i.e. there is no confusion about which variable comes first)?
- Q2. Were the participants included in any comparisons similar?
- Q3. Were the participants included in any comparisons receiving similar treatment/care, other than the exposure or intervention of interest?
- Q4. Was there a control group?
- Q5. Were there multiple measurements of the outcome both pre and post the intervention/exposure?
- Q6. Was follow up complete and if not, were differences between groups in terms of their follow up adequately described and analyzed?
- Q7. Were the outcomes of participants included in any comparisons measured in the same way?
- Q8. Were outcomes measured in a reliable way?
- Q9. Was appropriate statistical analysis used?"

**Checklist for qualitative research:**

- Q1. Is there congruity between the stated philosophical perspective and the research methodology?
- Q2. Is there congruity between the research methodology and the research question or objectives?
- Q3. Is there congruity between the research methodology and the methods used to collect data?
- Q4. Is there congruity between the research methodology and the representation and analysis of data?
- Q5. Is there congruity between the research methodology and the interpretation of results?
- Q6. Is there a statement locating the researcher culturally or theoretically?
- Q7. Is the influence of the researcher on the research, and vice-versa, addressed?
- Q8. Are participants, and their voices, adequately represented?
- Q9. Is the research ethical according to current criteria or, for recent studies, and is there evidence of ethical approval by an appropriate body?
- Q10. Do the conclusions drawn in the research report flow from the analysis, or interpretation, of the data?"

## References

1. Bonovich L. Recognizing the onset of labor. *J Obstet Gynecol Neonatal Nurs*. 1990;19(2):141-5.
2. Butz AM, Syron L, Johnson B, Spaulding J, Walker M, Bollinger ME. Home-based asthma self-management education for inner city children. *Public Health Nurs*. 2005;22(3):189-99.
3. Craun AM, Deffenbacher JL. The effects of information, behavioral rehearsal, and prompting on breast self-exams. *Journal of Behavioral Medicine*. 1987;10(4):351-65.
4. Jurgens CY, Lee CS, Reitano JM, Riegel B. Heart failure symptom monitoring and response training. *Heart & Lung*. 2013;42(4):273-80.
5. Scott SE, Khwaja M, Low EL, Weinman J, Grunfeld EA. A randomised controlled trial of a pilot intervention to encourage early presentation of oral cancer in high risk groups. *Patient Education and Counseling*. 2012;88(2):241-8.
6. Collard VT, van Essen-Zandvliet LE, Lans C, Denteneer A, Westers P, Brackel HJ. Poor adherence to self-medication instructions in children with asthma and their parents. *Patient Education & Counseling*. 2004;55(3):416-21.
7. Eriksen J, Mujinja P, Warsame M, Nsimba S, Kouyate B, Gustafsson LL, et al. Effectiveness of a community intervention on malaria in rural Tanzania - a randomised controlled trial. *African Health Sciences*. 2010;10(4):332-40.
8. Hunt TN. Video Educational Intervention Improves Reporting of Concussion and Symptom Recognition. *Athletic Training Education Journal (Allen Press Publishing Services Inc)*. 2015;10(1):65-74.
9. McLendon MS, Fulk CH, Starnes DC. Effectiveness of breast self-examination teaching to women of low socioeconomic class. *JOGN Nurs*. 1982;11(1):7-10.
10. Brailey LJ. Effects of health teaching in the workplace on women's knowledge, beliefs, and practices regarding breast self-examination. *Research in Nursing & Health*. 1986;9(3):223-31.
11. Hendricson WD, Wood PR, Hidalgo HA, Ramirez AG, Kromer ME, Selva M, et al. Implementation of individualized patient education for Hispanic children with asthma. *Patient Education & Counseling*. 1996;29(2):155-65.
12. Shepherd JH, McLnerney PA. Knowledge of breast self-examination in women in Sierra Leone. *Curationis*. 2007;30(4):38-44.
13. Brooks A, Predebon J, van der Zwan R. Perceptual strategies to improve skin cancer discriminations in naive observers. *Public Health*. 2001;115(2):139-45.
14. Cornell E, Robertson K, McIntosh RD, Rees JL. Viewing Exemplars of Melanomas and Benign Mimics of Melanoma Modestly Improves Diagnostic Skills in Comparison with the ABCD Method and Other Image-based Methods for Lay Identification of Melanoma. *Acta Dermato-Venereologica*. 2015;95(6):681-5.
15. Davis LL, McCoy TP. An Educational and Skill-Building Intervention to Improve Symptom Recognition and Interpretation in Women With Acute Coronary Syndrome: A Pilot Study. *Dccn*. 2019;38(1):29-37.
16. Khokhar A. Short text messages (SMS) as a reminder system for making working women from Delhi Breast Aware. *Asian Pac J Cancer Prev*. 2009;10(2):319-22.
17. Luther SL, Sroka S, Goormastic M, Montie JE. Teaching breast and testicular self-exams: evaluation of a high school curriculum pilot project. *Health Education*. 1985;16(1):40-3.
18. Matin SB, Wallingford A, Xu S, Ng N, Ho A, Vanosdoll M, et al. Feasibility of a mobile health tool for mothers to identify neonatal illness in rural Uganda: Acceptability study. *JMIR mHealth and uHealth*. 2020;8(2).
19. Robertson K, McIntosh RD, Bradley-Scott C, MacFarlane S, Rees JL. Image training, using random images of melanoma, performs as well as the ABC(D) criteria in enabling novices to distinguish between melanoma and mimics of melanoma. *Acta Derm Venereol*. 2014;94(3):265-70.
20. Sorensen J, Hertz A, Gudex C. Evaluation of a Danish teaching program in breast self-examination. *Cancer Nursing*. 2005;28(2):141-7.
21. Stratton BF, Nicholson ME, Olsen LK, Mahoney BS, Warland RH. Breast self-examination proficiency: Attitudinal, demographic, and behavioral characteristics. *Journal of Women's Health*. 1994;3(3):185-95.
22. Styrd AM. A breast self-examination program in an occupational health setting. *Occup Health Nurs*. 1982;30(4):33-5.
23. Ziadé N, Saad S, Al Mashaleh M, El Kibbi L, Elzorkany B, Badsha H, et al. Perceptions of patients with rheumatoid arthritis about self-assessment of disease activity after watching an

educational video: a qualitative pilot study from the AUTO-DAS in Middle Eastern Arab countries project. *Rheumatology International*. 2021.
